# Supplementary material
Source: PubMed Central journal article supplement (PMC5039921)

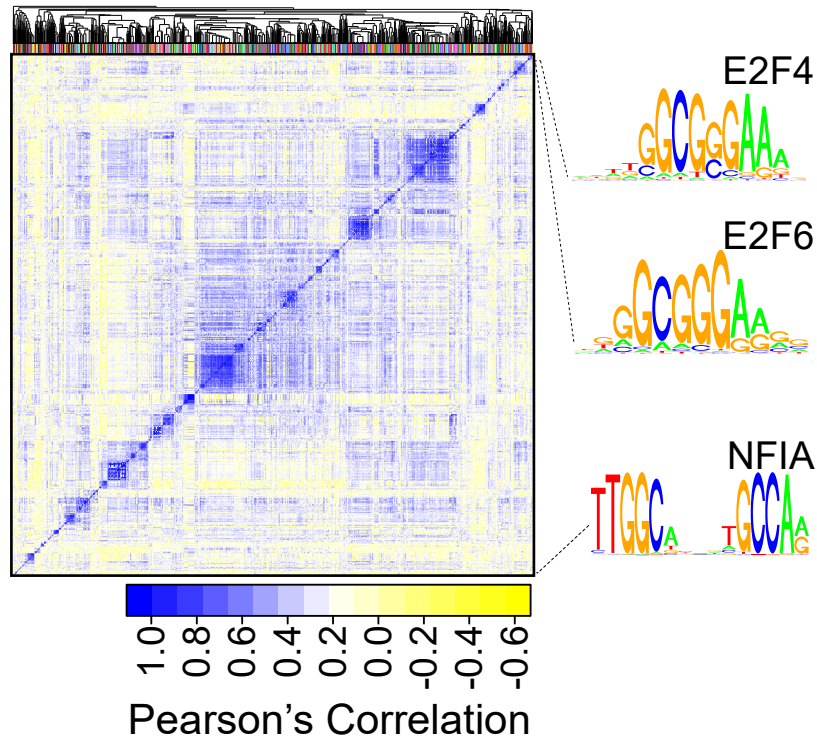

**Supplementary Fig. 1: Correlation between motifs with similar DNA binding specificities.** A correlation matrix grouping 1,964 motifs recognized by human TFs into 625 clusters using an affinity propagation clustering algorithm. The color scale represents Pearson's correlation between the DNA sequence specificity represented by each motif.

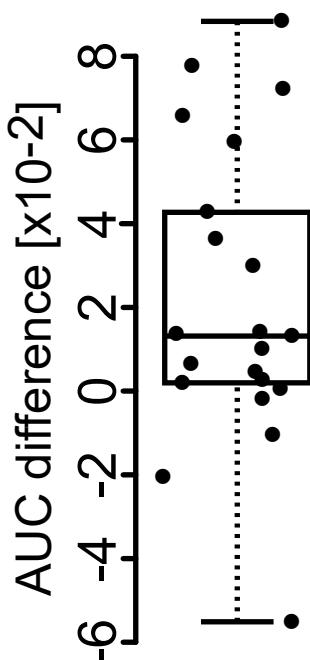

**Supplementary Fig. 2: Accuracy of motif classification using 1 or 4 GC content groups.** DNase-1 peaks in K562 cells were classified as either 'bound' or 'unbound' to 21 TFs using the motif match log-odds score. We computed the area under the receiver operating characteristic curve (AUC) using ChIP-seq data in K562 cells as a gold-standard set, either with or without dividing sequences into 4 separate GC content groups before scoring. The difference between AUCs when dividing sequences into either 1 or 4 separate GC content groups is indicated on the Y-axis. Individual points are shown, and the box-and-whiskers plot denotes the median, 25th and 75th percentile, and maximum values.

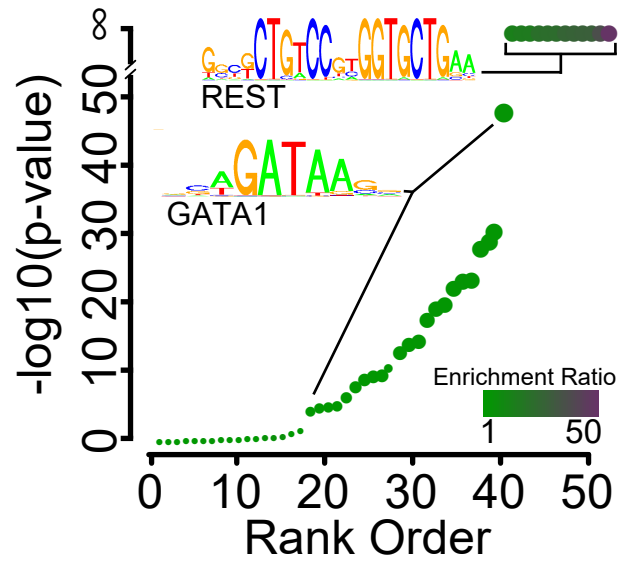

**Supplementary Fig. 3: Enrichment of motifs in REST ChIP-seq peaks.** The  $-\log_{10}$  p-value (Y-axis) as a function of the p-value rank order (X-axis) illustrates motifs enriched in ChIP-seq peaks binding the transcriptional repressor REST. The magnitude of enrichment is shown by the color scale and by the size of each point.

| TF     | AUC (GC1) | AUC (GC4) | accuracy | Motif Length | GC content |
|--------|-----------|-----------|----------|--------------|------------|
| ZBTB7A | 0.775     | 0.687     | 12.9     | 14.67±2.52   | 0.70±0.06  |
| E2F6   | 0.777     | 0.7       | 11.1     | 11.20±0.45   | 0.70±0.01  |
| MEF2A  | 0.81      | 0.738     | 9.8      | 15.64±4.78   | 0.28±0.04  |
| CTCF   | 0.748     | 0.689     | 8.6      | 15.00±0.00   | 0.80±0.00  |
| GATA2  | 0.866     | 0.8       | 8.2      | 11.90±3.54   | 0.39±0.07  |
| SP2    | 0.846     | 0.803     | 5.3      | 15.67±1.15   | 0.70±0.06  |
| EGR1   | 0.812     | 0.775     | 4.7      | 15.00±3.34   | 0.75±0.06  |
| GABPA  | 0.753     | 0.723     | 4.1      | 12.43±1.81   | 0.63±0.03  |
| ELF1   | 0.771     | 0.757     | 1.9      | 12.12±1.81   | 0.59±0.05  |
| SP1    | 0.865     | 0.852     | 1.6      | 12.50±3.33   | 0.77±0.05  |
| FOSL1  | 0.863     | 0.85      | 1.5      | 12.00±1.73   | 0.48±0.01  |
| ZBTB33 | 0.824     | 0.814     | 1.2      | 13.50±2.12   | 0.58±0.04  |
| ATF3   | 0.663     | 0.657     | 1        | 10.00±1.15   | 0.57±0.08  |
| USF1   | 0.838     | 0.833     | 0.5      | 12.45±2.50   | 0.61±0.05  |
| MAX    | 0.69      | 0.687     | 0.4      | 11.75±2.14   | 0.61±0.05  |
| REST   | 0.643     | 0.641     | 0.3      | 17.17±3.07   | 0.61±0.02  |
| SPI1   | 0.723     | 0.722     | 0.1      | 16.50±2.17   | 0.43±0.03  |
| ETS1   | 0.765     | 0.767     | -0.3     | 14.44±5.03   | 0.55±0.05  |
| YY1    | 0.716     | 0.726     | -1.4     | 14.25±2.63   | 0.57±0.05  |
| TBP    | 0.689     | 0.744     | -7.4     | 10.80±2.59   | 0.24±0.10  |

**Supplementary Table 1: Accuracy of motif classification using 1 or 4 GC content groups.** Related to the box and whiskers plot (Supplementary Fig. 2). The table shows the TF name, the area under the receiver operating characteristic curve (AUC) for 1 and 4 GC content groups, the differences in accuracy between groups (percent difference), the motif length, and the GC content. Errors associated with the motif length and GC content group show standard errors between different motifs associated with each TF.

| TF.Name | Representative Logo | p-value | Enrich* | Rank | Dist. | Top Motif | Top TF  | Known Interaction                                        |
|---------|---------------------|---------|---------|------|-------|-----------|---------|----------------------------------------------------------|
| SRF     |                     | <6e-49  | 60.4    | 1    | 0     |           | SRF     |                                                          |
| ZNF274  |                     | <5e-37  | 48.7    | 1    | 0     |           | ZNF274  |                                                          |
| REST    |                     | <=0     | 48.4    | 1    | 0     |           | REST    |                                                          |
| CEBPB   |                     | <=0     | 41.7    | 1    | 0     |           | CEBPB   |                                                          |
| SPI1    |                     | <2e-66  | 25.1    | 1    | 0     |           | SPI1    |                                                          |
| MEF2A   |                     | <3e-06  | 17.6    | 1    | 0     |           | MEF2A   |                                                          |
| CTCF    |                     | <1e-128 | 16.6    | 1    | 0     |           | CTCF    |                                                          |
| MAFF    |                     | <1e-52  | 14.8    | 1    | 0     |           | MAFF    |                                                          |
| NRF1    |                     | <6e-130 | 14.1    | 1    | 0     |           | NRF1    |                                                          |
| USF1    |                     | <=0     | 13.5    | 1    | 0.1   |           | ARNTL   |                                                          |
| YY1     |                     | <6e-267 | 11.5    | 1    | 0     |           | YY1     |                                                          |
| EGR1    |                     | <2e-26  | 11.3    | 1    | 0     |           | EGR1    |                                                          |
| NFYB    |                     | <7e-272 | 11.1    | 1    | 0.1   |           | NFYA    |                                                          |
| NFYA    |                     | <2e-40  | 10.9    | 1    | 0     |           | NFYA    |                                                          |
| ELK1    |                     | <1e-06  | 10.2    | 1    | 0     |           | ELK1    |                                                          |
| GATA1   |                     | <=0     | 10.1    | 7    | 0.8   |           | SOX18   | Yes: Murakami et. al. (2004),<br>Kuwahara et. al. (2012) |
| ZBTB33  |                     | <5e-160 | 10      | 1    | 0     |           | BRCA1   |                                                          |
| FOSL1   |                     | <=0     | 9.8     | 1    | 0.1   |           | NFE2    |                                                          |
| FOS     |                     | <=0     | 9.6     | 1    | 0.1   |           | NFE2    |                                                          |
| MAFK    |                     | <1e-157 | 9.5     | 1    | 0.1   |           | MAFF    |                                                          |
| USF2    |                     | <=0     | 9       | 1    | 0.2   |           | ARNTL   |                                                          |
| BACH1   |                     | <1e-54  | 8.7     | 1    | 0     |           | BACH1   |                                                          |
| ETS1    |                     | <6e-27  | 7.8     | 1    | 0.1   |           | SMARCC2 |                                                          |
| ELF1    |                     | <9e-51  | 7.7     | 1    | 0     |           | ELF3    |                                                          |
| BHLHE40 |                     | <2e-88  | 7.6     | 4    | 0     |           | BHLHE41 |                                                          |
| JUNB    |                     | <7e-147 | 5.4     | 1    | 0.1   |           | NFE2    |                                                          |
| JUN     |                     | <4e-131 | 5.4     | 1    | 0.1   |           | ATF3    |                                                          |
| NFE2    |                     | <2e-123 | 5       | 1    | 0.2   |           | BACH1   |                                                          |
| MAX     |                     | <3e-21  | 4.7     | 4    | 0.2   |           | HES7    |                                                          |
| SIX5    |                     | <9e-49  | 4.5     | 1    | 0.4   |           | ETS1    |                                                          |
| JUND    |                     | <6e-30  | 4.2     | 1    | 0.1   |           | BATF3   |                                                          |
| GATA2   |                     | <2e-155 | 3.9     | 11   | 0.5   |           | MECOM   |                                                          |
| GABPA   |                     | <4e-66  | 3.6     | 1    | 0.3   |           | ELK1    |                                                          |
| THAP1   |                     | <5e-08  | 3.2     | 1    | 0     |           | THAP1   |                                                          |
| ATF1    |                     | <5e-24  | 2.7     | 5    | 0.2   |           | BATF3   |                                                          |
| RFX5    |                     | <1e-185 | 2.7     | 9    | 0.6   |           | BATF3   | Yes: Lochamy et. al. (2007)                              |
| NR2C2   |                     | <1e-13  | 2.7     | 1    | 0.3   |           | NR1H3   |                                                          |
| MXI1    |                     | <5e-20  | 2.4     | 1    | 0.2   |           | RFX5    | Possible: Neph et. al. (2012)                            |
| CTCF    |                     | <4e-68  | 2.2     | 1    | 0.2   |           | CTCF    |                                                          |
| ZNF143  |                     | <2e-07  | 2.1     | 1    | 0.1   |           | SMARCC2 |                                                          |
| MYC     |                     | <1e-43  | 2.1     | 25   | 0.7   |           | E2F1    | Possible: Wanzel et. al. (2003)                          |
| ATF3    |                     | <2e-33  | 2.1     | 1    | 0.2   |           | ARNTL   |                                                          |
| STAT5A  |                     | <3e-08  | 1.9     | 3    | 0.8   |           | SRF     | Possible: Engblom et. al. (2007)                         |
| ARID3A  |                     | <6e-06  | 1.9     | 32   | 0.7   |           | POU3F2  | Yes: Rhee et. al. (2014)                                 |
| ZNF263  |                     | <1e-40  | 1.7     | 6    | 0.9   |           | ZNF423  |                                                          |
| SP2     |                     | <3e-47  | 1.7     | 20   | 0.6   |           | NFYA    | Yes: Roder et. al (1999)                                 |

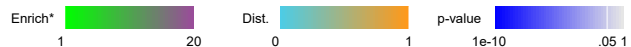

Supplement: supp_btw338_Supplement_Merged.pdf [file supp_btw338_Supplement_Merged.pdf]
